# Supplementary material for: MicroC3: an ex vivo microfluidic cis-coculture assay to test chemosensitivity and resistance of patient multiple myeloma cells
Source: Royal Society of Chemistry journal article supplement (doi:10.1039/c5ib00071h), 2015-01-01
Supplement: c5ib00071h1.pdf [file c5ib00071h1.pdf]

## Supplementary Materials

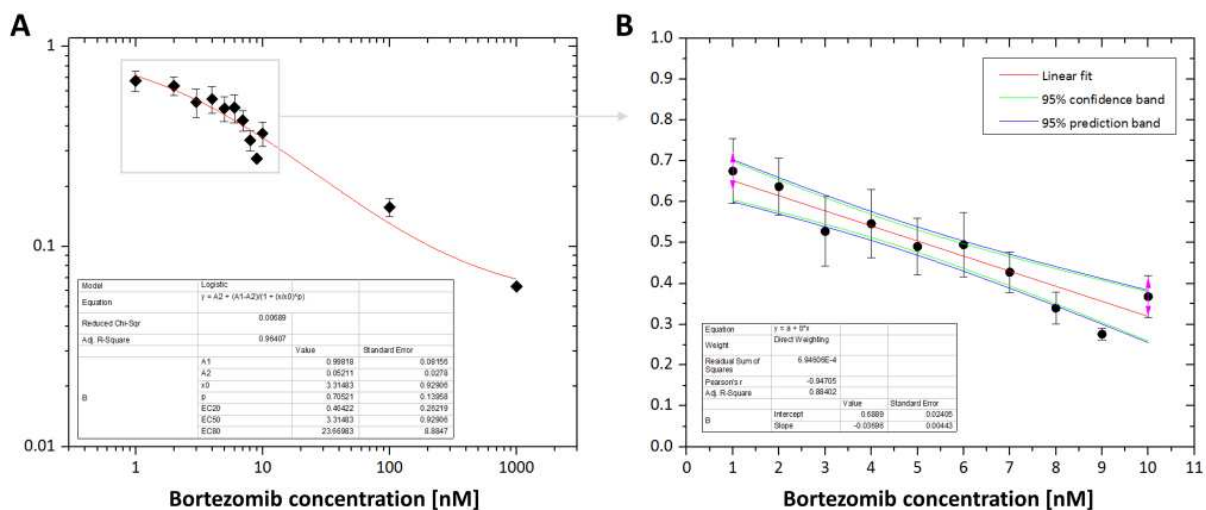

**Figure S1. Inhibition of the proteasome activity in RPMI8226 cells by varying concentrations of bortezomib.** The graph on the left shows the decrease in the fraction of proteasome activity in RPMI8226 cells in response to increasing concentrations of bortezomib treated for 105 minutes. The red curve denotes a fitted curve with an  $R^2$  value of 0.964. A different, linear curve was fitted to the 0, 1, 2, 3, 4, 5, 6, 7, 8, 9, and 10 nM concentrations of bortezomib, shown on the graph on the right. Error bars are SEM with  $n=3$  technical replicates.

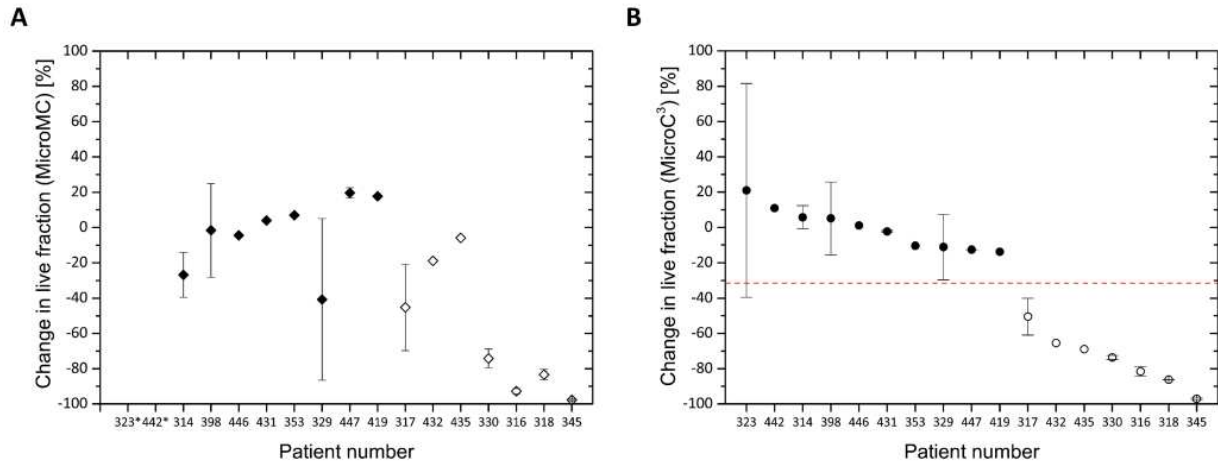

**Figure S2. Patient MM tumor cell mean live fraction at 100 nM.** The mean live fraction of patient MM tumor cells's *ex vivo* response to 100 nM bortezomib is shown for MicroMC (A) and MicroC<sup>3</sup> (B) in descending order of the change in live fraction according to MicroC<sup>3</sup>. Range bars are shown for those patients for whom technical replicates were/were able to be performed (n=2). Open symbols denote clinically responsive patients whereas solid symbols indicate clinically non-responsive patients. The patients with an asterisk denote those omitted from MicroMC analysis (Pt's 323 and 442). The red line marks the Otsu threshold.

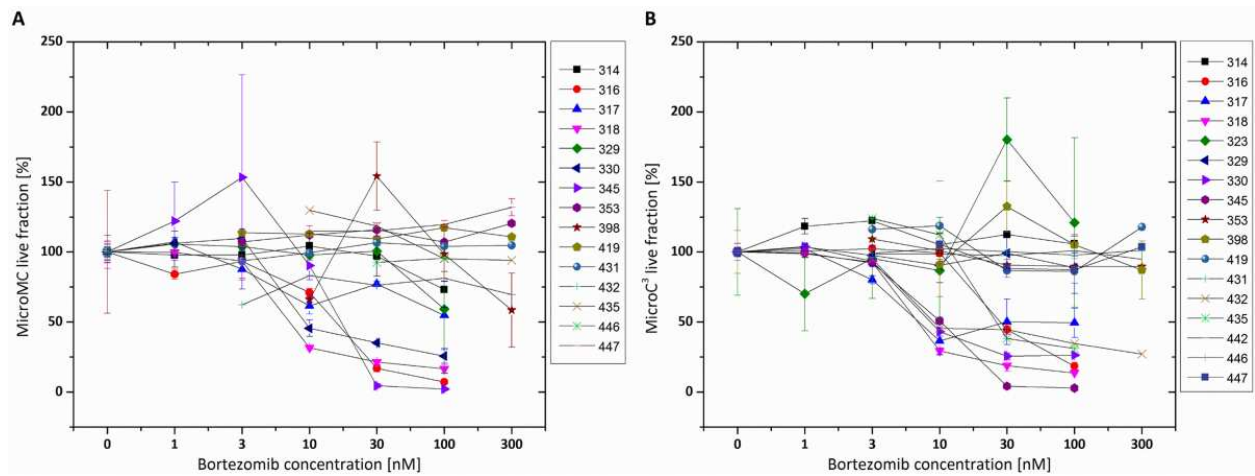

**Figure S3. *Ex vivo* responses of patient MM tumor cells to bortezomib.** *Ex vivo* responses patients' MM cells in MicroMC (A) and MicroC<sup>3</sup>(B) to bortezomib are shown. Range bars are shown for those patients for whom technical replicates were/were able to be performed (n=2).

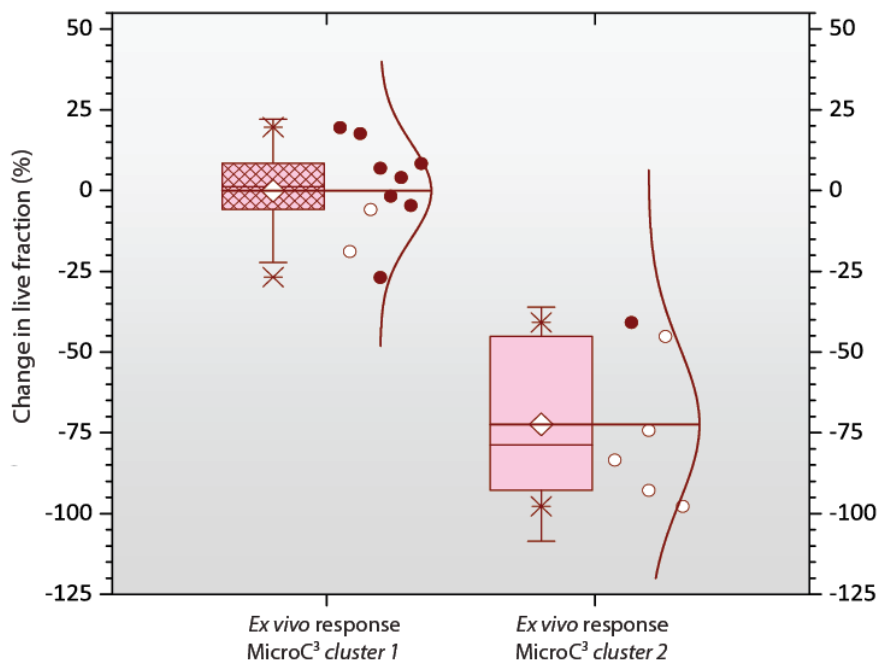

**Figure S4. K-means clustered *ex vivo* responses of MM patient tumor cells in MicroMC to bortezomib.** Box plots of patient *ex vivo* responses in MicroMC (MC) to bortezomib clustered by k-means clustering shown in blue. Open symbols denote clinically responsive patients whereas solid symbols indicate clinically non-responsive patients.

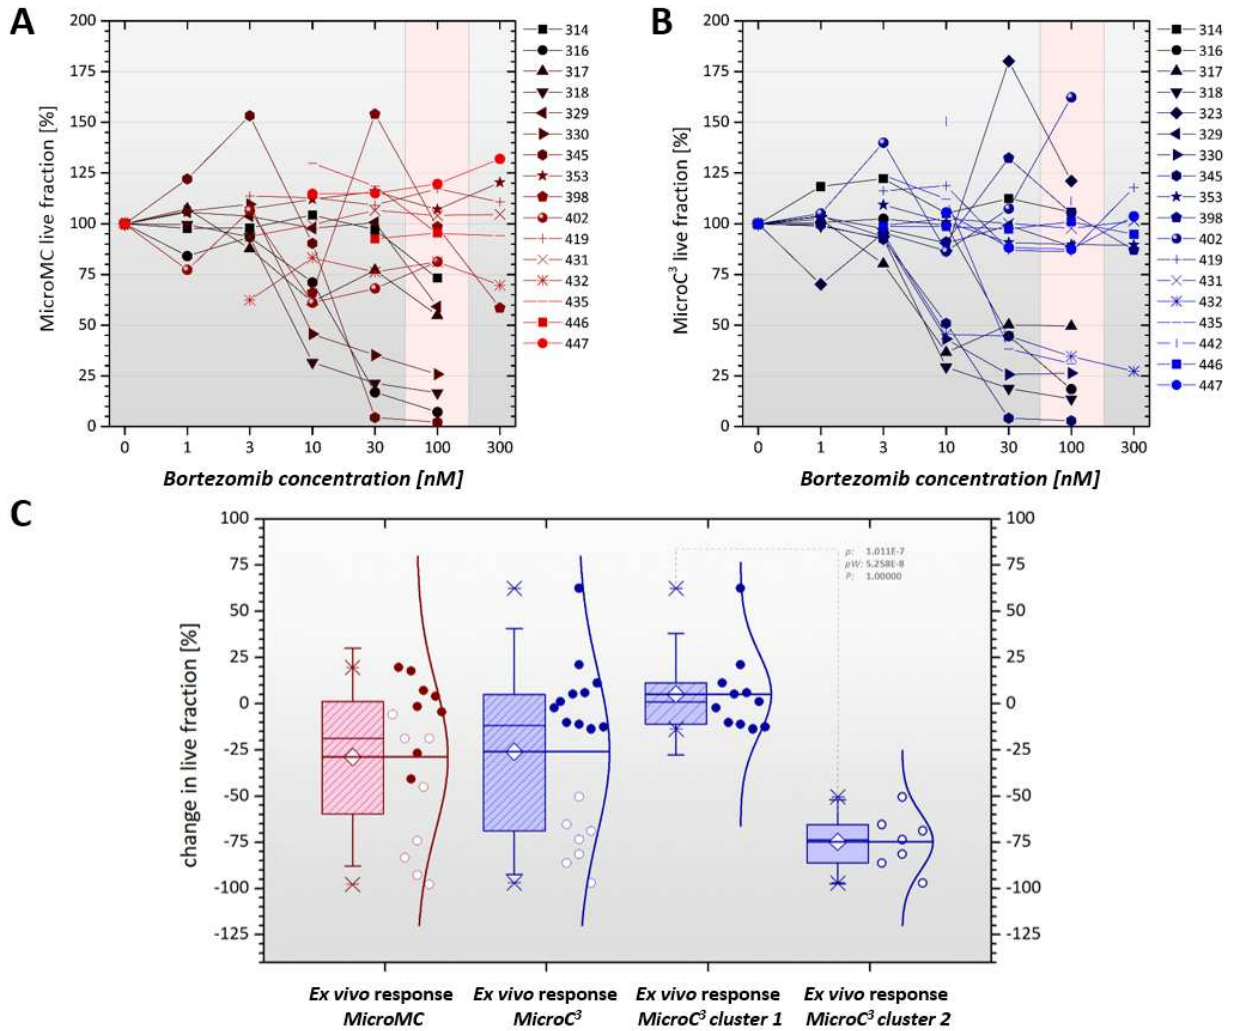

**Figure S5. *Ex vivo* responses of patient MM tumor cells to bortezomib including Pt 402.** (A) *Ex vivo* responses patients' MM cells in MicroMC to bortezomib are shown. (B) *Ex vivo* responses of patients' MM cells in MicroC<sup>3</sup> to bortezomib are shown. (C) The first two box plots show patient MM tumor cells' *ex vivo* responses to bortezomib compared between MicroMC (MC, shown in red) and MicroC<sup>3</sup> (shown in blue) (x-axis). The live fraction change is compared between the 0 dose and 100 nM dose of bortezomib (y-axis). K-means and Gaussian clustering methods were applied to MicroC<sup>3</sup>, resulting in two clusters of the *ex vivo cis*-cocultured patient MM tumor cells' responses to bortezomib (Cluster 1 and Cluster 2). The same clustering methods applied to MicroMC resulted in one cluster. The two clusters for MicroC<sup>3</sup> are shown in blue as the two box plots on the right.

| <b>Patient number</b>                                       | <b>Mononuclear cell count before cryo</b> | <b>Mononuclear cell count after cryo</b> | <b>% alive after cryo</b> | <b>Number of CD138+ cells</b> |
|-------------------------------------------------------------|-------------------------------------------|------------------------------------------|---------------------------|-------------------------------|
| <b>142</b>                                                  | 1,200,000                                 | 150,000                                  | 12.5%                     | 0                             |
| <b>154</b>                                                  | 1,000,000                                 | 200,000                                  | 20%                       | 0                             |
| <b>321</b>                                                  | 15,600,000                                | 5,040,000                                | 32.3%                     | 800,000                       |
| <b>333</b>                                                  | 12,800,000                                | 180,000                                  | 1.4%                      | 0                             |
| <b>334</b>                                                  | 14,200,000                                | 2,800,000                                | 19.7%                     | 400,000                       |
| <b>335</b>                                                  | 7,840,000                                 | 2,000,000                                | 25.5%                     | 80,000                        |
| <b>337</b>                                                  | 3,830,000                                 | 1,500,000                                | 39.2%                     | 50,000                        |
| <b>345</b>                                                  | 27,000,000                                | 9,900,000                                | 36.7%                     | 320,000                       |
| <b>345 (F)</b>                                              | 27,000,000                                |                                          |                           | 1,500,000                     |
| <b>348</b>                                                  | 1,900,000                                 | 400,000                                  | 21.1%                     | 0                             |
| <b>378</b>                                                  | 24,000,000                                | 8,700,000                                | 36.3%                     | 200,000                       |
| <b>Average</b>                                              | 10,937,000                                | 3,087,000                                | 24.5%                     | 185,000                       |
| F, freshly sort/no cryopreservation; cryo, cryopreservation |                                           |                                          |                           |                               |

**Table S1. Patient MM tumor cell counts after cryopreservation.**

| <b>Time [hr]</b> | <b>Fraction proteasome activity</b> | <b>Bort [nM]</b> | <b>Bort [ng/mL]</b> |
|------------------|-------------------------------------|------------------|---------------------|
| 0                | 0.15719                             | 10               | 38.424              |
| 0.25             | 0.40456                             | 7.69312          | 29.56               |
| 0.5              | 0.58288                             | 2.86845          | 11.02               |
| 1                | 0.65536                             | 0.90736          | 3.48                |
| 2                | 0.53691                             | 4.11238          | 15.8                |
| 4                | 0.64557                             | 1.17227          | 4.5                 |
| 6                | 0.5382                              | 4.07738          | 15.67               |
| 8                | 0.5967                              | 2.49447          | 9.58                |
| 10               | 0.63714                             | 1.40053          | 5.39                |
| 12               | 1.00111                             | -8.44731         | 0                   |
| 14               | 0.85956                             | -4.61743         | 0                   |
| 16               | 1.08216                             | -10.6402         | 0                   |
| 24               | 1.17081                             | -13.0387         | 0                   |
| <b>AUC</b>       |                                     | 112.9155         |                     |

**Table S2. Extrapolation of the concentrations of 100 nM bortezomib over 24 hours within MicroC<sup>3</sup>**

100 nM results:

| MicroMC    |                                 |                      |                        |                     |                        |  |
|------------|---------------------------------|----------------------|------------------------|---------------------|------------------------|--|
| Patient ID | Clinical response to Bortezomib | Ex vivo response [%] | kM cluster (k=2) index | kM Silhouette value | GM cluster (k=2) index |  |
| 314        | non-responder                   | -26.8                | 1                      | 0.642               | 2                      |  |
| 316        | responder                       | -92.8                | 2                      | 0.873               | 2                      |  |
| 317        | responder                       | -45.2                | 2                      | 0.299               | 2                      |  |
| 318        | responder                       | -83.4                | 2                      | 0.894               | 2                      |  |
| 323        | non-responder                   | n/a                  | n/a                    | n/a                 | n/a                    |  |
| 345        | responder                       | -97.8                | 2                      | 0.856               | 2                      |  |
| 402        | non-responder                   | n/a                  | n/a                    | n/a                 | n/a                    |  |
| 442        | non-responder                   | n/a                  | n/a                    | n/a                 | n/a                    |  |

| MicroC <sup>2</sup> |                                 |                      |                        |                     |                        |  |
|---------------------|---------------------------------|----------------------|------------------------|---------------------|------------------------|--|
| Patient ID          | Clinical response to Bortezomib | Ex vivo response [%] | kM cluster (k=2) index | kM Silhouette value | GM cluster (k=2) index |  |
| 314                 | non-responder                   | 5.8                  | 1                      | 0.935               | 1                      |  |
| 316                 | responder                       | -81.5                | 2                      | 0.964               | 2                      |  |
| 317                 | responder                       | -50.5                | 2                      | 0.736               | 2                      |  |
| 318                 | responder                       | -86.3                | 2                      | 0.956               | 2                      |  |
| 323                 | non-responder                   | 21.0                 | 1                      | 0.923               | 1                      |  |
| 345                 | responder                       | -97.1                | 2                      | 0.925               | 2                      |  |
| 402                 | non-responder                   | 62.4                 | n/a                    | n/a                 | n/a                    |  |
| 442                 | non-responder                   | 11.0                 | 1                      | 0.937               | 1                      |  |

|     |               |       |   |        |   |  |
|-----|---------------|-------|---|--------|---|--|
| 329 | non-responder | -40.8 | 2 | -0.022 | 2 |  |
| 330 | responder     | -74.2 | 2 | 0.892  | 2 |  |
| 353 | non-responder | 7.0   | 1 | 0.954  | 1 |  |
| 398 | non-responder | -1.6  | 1 | 0.959  | 1 |  |
| 419 | non-responder | 17.7  | 1 | 0.927  | 1 |  |
| 431 | non-responder | 4.0   | 1 | 0.959  | 1 |  |
| 432 | responder     | -18.8 | 1 | 0.837  | 1 |  |
| 435 | responder     | -5.9  | 1 | 0.953  | 1 |  |
| 446 | non-responder | -4.5  | 1 | 0.954  | 1 |  |
| 447 | non-responder | 19.6  | 1 | 0.919  | 1 |  |

|     |               |       |   |       |   |  |
|-----|---------------|-------|---|-------|---|--|
| 329 | non-responder | -11.1 | 1 | 0.831 | 1 |  |
| 330 | responder     | -73.6 | 2 | 0.965 | 2 |  |
| 353 | non-responder | -10.3 | 1 | 0.841 | 1 |  |
| 398 | non-responder | 5.1   | 1 | 0.933 | 1 |  |
| 419 | non-responder | -13.7 | 1 | 0.791 | 1 |  |
| 431 | non-responder | -2.3  | 1 | 0.909 | 1 |  |
| 432 | responder     | -65.4 | 2 | 0.938 | 2 |  |
| 435 | responder     | -68.9 | 2 | 0.954 | 2 |  |
| 446 | non-responder | 1.0   | 1 | 0.924 | 1 |  |
| 447 | non-responder | -12.6 | 1 | 0.809 | 1 |  |

|                       |         |
|-----------------------|---------|
| AIC unimodal (k=1)    | 156.681 |
| AIC bimodal (k=2)     | 156.591 |
| AIC trimodal (k=3)    | 157.407 |
| BIC unimodal (k=1)    | 158.097 |
| BIC bimodal (k=2)     | 160.131 |
| BIC trimodal (k=3)    | 163.071 |
| Mean Silhouette (k=2) | 0.818   |

|                       |         |
|-----------------------|---------|
| AIC unimodal (k=1)    | 176.397 |
| AIC bimodal (k=2)     | 164.746 |
| AIC trimodal (k=3)    | 168.091 |
| BIC unimodal (k=1)    | 178.064 |
| BIC bimodal (k=2)     | 168.079 |
| BIC trimodal (k=3)    | 173.091 |
| Mean Silhouette (k=2) | 0.892   |

30 nM results:

| MicroMC    |                                 |                      |                        |                     |                        |  |
|------------|---------------------------------|----------------------|------------------------|---------------------|------------------------|--|
| Patient ID | Clinical response to Bortezomib | Ex vivo response [%] | kM cluster (k=2) index | kM Silhouette value | GM cluster (k=2) index |  |
| 314        | non-responder                   | -3.0                 | 1                      | 0.913               | 1                      |  |
| 316        | responder                       | -83.1                | 2                      | 0.978               | 2                      |  |
| 317        | responder                       | -22.9                | 1                      | 0.650               | 2                      |  |
| 318        | responder                       | -78.5                | 2                      | 0.977               | 2                      |  |
| 323        | non-responder                   | n/a                  | n/a                    | n/a                 | n/a                    |  |
| 345        | responder                       | -95.5                | 2                      | 0.954               | 2                      |  |
| 402        | non-responder                   | -32.0                | n/a                    | n/a                 | n/a                    |  |
| 442        | non-responder                   | n/a                  | n/a                    | n/a                 | n/a                    |  |

| MicroC <sup>2</sup> |                                 |                      |                        |                     |                        |  |
|---------------------|---------------------------------|----------------------|------------------------|---------------------|------------------------|--|
| Patient ID          | Clinical response to Bortezomib | Ex vivo response [%] | kM cluster (k=2) index | kM Silhouette value | GM cluster (k=2) index |  |
| 314                 | non-responder                   | 12.4                 | 1                      | 0.878               | 1                      |  |
| 316                 | responder                       | -55.3                | 2                      | 0.907               | 2                      |  |
| 317                 | responder                       | -49.8                | 2                      | 0.847               | 2                      |  |
| 318                 | responder                       | -81.2                | 2                      | 0.945               | 2                      |  |
| 323                 | non-responder                   | 80.2                 | 1                      | 0.713               | 1                      |  |
| 345                 | responder                       | -95.8                | 2                      | 0.898               | 2                      |  |
| 402                 | non-responder                   | 7.5                  | n/a                    | n/a                 | n/a                    |  |
| 442                 | non-responder                   | n/a                  | n/a                    | n/a                 | n/a                    |  |

|     |               |       |   |       |   |  |
|-----|---------------|-------|---|-------|---|--|
| 329 | non-responder | 0.6   | 1 | 0.925 | 1 |  |
| 330 | responder     | -64.9 | 2 | 0.903 | 2 |  |
| 353 | non-responder | 15.8  | 1 | 0.927 | 1 |  |
| 398 | non-responder | 54.1  | 1 | 0.815 | 2 |  |
| 419 | non-responder | 9.2   | 1 | 0.933 | 1 |  |
| 431 | non-responder | 6.6   | 1 | 0.933 | 1 |  |
| 432 | responder     | -23.8 | 1 | 0.623 | 2 |  |
| 435 | responder     | 18.5  | 1 | 0.922 | 1 |  |
| 446 | non-responder | -7.4  | 1 | 0.889 | 2 |  |
| 447 | non-responder | 15.0  | 1 | 0.928 | 1 |  |

|     |               |       |   |       |   |  |
|-----|---------------|-------|---|-------|---|--|
| 329 | non-responder | -0.9  | 1 | 0.804 | 1 |  |
| 330 | responder     | -74.3 | 2 | 0.957 | 2 |  |
| 353 | non-responder | -9.3  | 1 | 0.674 | 1 |  |
| 398 | non-responder | 32.4  | 1 | 0.865 | 1 |  |
| 419 | non-responder | -13.2 | 1 | 0.573 | 1 |  |
| 431 | non-responder | 0.2   | 1 | 0.815 | 1 |  |
| 432 | responder     | -55.4 | 2 | 0.908 | 2 |  |
| 435 | responder     | -61.8 | 2 | 0.945 | 2 |  |
| 446 | non-responder | -2.5  | 1 | 0.786 | 1 |  |
| 447 | non-responder | -11.7 | 1 | 0.614 | 1 |  |

|                       |         |
|-----------------------|---------|
| AIC unimodal (k=1)    | 158.971 |
| AIC bimodal (k=2)     | 159.090 |
| AIC trimodal (k=3)    | 160.333 |
| BIC unimodal (k=1)    | 160.387 |
| BIC bimodal (k=2)     | 162.630 |
| BIC trimodal (k=3)    | 165.998 |
| Mean Silhouette (k=2) | 0.882   |

|                       |         |
|-----------------------|---------|
| AIC unimodal (k=1)    | 161.495 |
| AIC bimodal (k=2)     | 164.844 |
| AIC trimodal (k=3)    | 168.844 |
| BIC unimodal (k=1)    | 162.911 |
| BIC bimodal (k=2)     | 167.676 |
| BIC trimodal (k=3)    | 173.092 |
| Mean Silhouette (k=2) | 0.819   |

kM, k-means clustering; GM, Gaussian mixture clustering; AIC, Akaike Information Criterion; BIC, Bayesian Information Criterion

Table S3. K-means and Gaussian mixture model clustering analysis of *ex vivo* bortezomib sensitivities.



100 nM results:

| Patient ID | Clinical response to Bortezomib | Ex vivo response [%] | MicroMC                |                        |     |
|------------|---------------------------------|----------------------|------------------------|------------------------|-----|
|            |                                 |                      | kM cluster (k=2) index | GM cluster (k=2) index |     |
| 314        | non-responder                   | -26.8                | 1                      | 0.642                  | 1   |
| 316        | responder                       | -92.8                | 2                      | 0.873                  | 2   |
| 317        | responder                       | -45.2                | 2                      | 0.299                  | 1   |
| 318        | responder                       | -83.4                | 2                      | 0.894                  | 2   |
| 323        | non-responder                   | n/a                  | n/a                    | n/a                    | n/a |
| 345        | responder                       | -97.8                | 2                      | 0.856                  | 2   |
| 402        | non-responder                   | -18.8                | 1                      | 0.838                  | 1   |
| 442        | non-responder                   | n/a                  | n/a                    | n/a                    | n/a |

| Patient ID | Clinical response to Bortezomib | Ex vivo response [%] | MicroC <sup>3</sup>    |                     |                        |                        |                     |                        |
|------------|---------------------------------|----------------------|------------------------|---------------------|------------------------|------------------------|---------------------|------------------------|
|            |                                 |                      | kM cluster (k=2) index | kM Silhouette value | GM cluster (k=2) index | kM cluster (k=3) index | kM Silhouette value | GM cluster (k=3) index |
| 314        | non-responder                   | 5.8                  | 1                      | 0.935               | 1                      | 1                      | 0.944               | 1                      |
| 316        | responder                       | -81.5                | 2                      | 0.964               | 2                      | 2                      | 0.957               | 2                      |
| 317        | responder                       | -50.5                | 2                      | 0.736               | 2                      | 2                      | 0.648               | 2                      |
| 318        | responder                       | -86.3                | 2                      | 0.956               | 2                      | 2                      | 0.948               | 2                      |
| 323        | non-responder                   | 21.0                 | 1                      | 0.923               | 1                      | 1                      | 0.620               | 1                      |
| 345        | responder                       | -97.1                | 2                      | 0.925               | 2                      | 2                      | 0.914               | 2                      |
| 402        | non-responder                   | 62.4                 | 1                      | 0.788               | 1                      | 3                      | 0.890               | 3                      |
| 442        | non-responder                   | 11.0                 | 1                      | 0.937               | 1                      | 1                      | 0.890               | 1                      |

|     |               |       |   |        |   |
|-----|---------------|-------|---|--------|---|
| 329 | non-responder | -40.8 | 2 | -0.022 | 1 |
| 330 | responder     | -74.2 | 2 | 0.892  | 2 |
| 353 | non-responder | 7.0   | 1 | 0.954  | 1 |
| 398 | non-responder | -1.6  | 1 | 0.959  | 1 |
| 419 | non-responder | 17.7  | 1 | 0.927  | 1 |
| 431 | non-responder | 4.0   | 1 | 0.959  | 1 |
| 432 | responder     | -18.8 | 1 | 0.837  | 1 |
| 435 | responder     | -5.9  | 1 | 0.953  | 1 |
| 446 | non-responder | -4.5  | 1 | 0.954  | 1 |
| 447 | non-responder | 19.6  | 1 | 0.919  | 1 |

|     |               |       |   |       |   |   |       |   |
|-----|---------------|-------|---|-------|---|---|-------|---|
| 329 | non-responder | -11.1 | 1 | 0.831 | 1 | 1 | 0.940 | 1 |
| 330 | responder     | -73.6 | 2 | 0.965 | 2 | 2 | 0.957 | 2 |
| 353 | non-responder | -10.3 | 1 | 0.841 | 1 | 1 | 0.945 | 1 |
| 398 | non-responder | 5.1   | 1 | 0.933 | 1 | 1 | 0.948 | 1 |
| 419 | non-responder | -13.7 | 1 | 0.791 | 1 | 1 | 0.917 | 1 |
| 431 | non-responder | -2.3  | 1 | 0.909 | 1 | 1 | 0.967 | 1 |
| 432 | responder     | -65.4 | 2 | 0.938 | 2 | 2 | 0.923 | 2 |
| 435 | responder     | -68.9 | 2 | 0.954 | 2 | 2 | 0.943 | 2 |
| 446 | non-responder | 1.0   | 1 | 0.924 | 1 | 1 | 0.964 | 1 |
| 447 | non-responder | -12.6 | 1 | 0.809 | 1 | 1 | 0.928 | 1 |

|                       |         |
|-----------------------|---------|
| AIC unimodal (k=1)    | 165.902 |
| AIC bimodal (k=2)     | 162.990 |
| AIC trimodal (k=3)    | 168.990 |
| BIC unimodal (k=1)    | 167.447 |
| BIC bimodal (k=2)     | 166.853 |
| BIC trimodal (k=3)    | 175.170 |
| Mean Silhouette (k=2) | 0.784   |

| Analysis with pt 402  |         | Analysis without pt 402 |         |
|-----------------------|---------|-------------------------|---------|
| AIC unimodal (k=1)    | 190.606 | AIC unimodal (k=1)      | 176.397 |
| AIC bimodal (k=2)     | 188.176 | AIC bimodal (k=2)       | 164.746 |
| AIC trimodal (k=3)    | 183.306 | AIC trimodal (k=3)      | 168.091 |
| BIC unimodal (k=1)    | 192.387 | BIC unimodal (k=1)      | 178.064 |
| BIC bimodal (k=2)     | 191.737 | BIC bimodal (k=2)       | 168.079 |
| BIC trimodal (k=3)    | 188.648 | BIC trimodal (k=3)      | 173.091 |
| Mean Silhouette (k=2) | 0.892   | Mean Silhouette (k=3)   | 0.909   |

30 nM results:

| Patient ID | Clinical response to Bortezomib | Ex vivo response [%] | MicroMC                |                        |     |
|------------|---------------------------------|----------------------|------------------------|------------------------|-----|
|            |                                 |                      | kM cluster (k=2) index | GM cluster (k=2) index |     |
| 314        | non-responder                   | -3.0                 | 1                      | 0.913                  | 1   |
| 316        | responder                       | -83.1                | 2                      | 0.978                  | 2   |
| 317        | responder                       | -22.9                | 1                      | 0.650                  | 2   |
| 318        | responder                       | -78.5                | 2                      | 0.977                  | 2   |
| 323        | non-responder                   | n/a                  | n/a                    | n/a                    | n/a |
| 345        | responder                       | -95.5                | 2                      | 0.954                  | 2   |
| 402        | non-responder                   | -32.0                | 1                      | 0.275                  | 2   |
| 442        | non-responder                   | n/a                  | n/a                    | n/a                    | n/a |

| Patient ID | Clinical response to Bortezomib | Ex vivo response [%] | MicroC <sup>3</sup>    |                     |                        |
|------------|---------------------------------|----------------------|------------------------|---------------------|------------------------|
|            |                                 |                      | kM cluster (k=2) index | kM Silhouette value | GM cluster (k=2) index |
| 314        | non-responder                   | 12.4                 | 1                      | 0.878               | 1                      |
| 316        | responder                       | -55.3                | 2                      | 0.907               | 2                      |
| 317        | responder                       | -49.8                | 2                      | 0.847               | 2                      |
| 318        | responder                       | -81.2                | 2                      | 0.945               | 2                      |
| 323        | non-responder                   | 80.2                 | 1                      | 0.713               | 1                      |
| 345        | responder                       | -95.8                | 2                      | 0.898               | 2                      |
| 402        | non-responder                   | 7.5                  | 1                      | 0.864               | 1                      |
| 442        | non-responder                   | n/a                  | n/a                    | n/a                 | n/a                    |

|     |               |       |   |       |   |
|-----|---------------|-------|---|-------|---|
| 329 | non-responder | 0.6   | 1 | 0.925 | 1 |
| 330 | responder     | -64.9 | 2 | 0.903 | 2 |
| 353 | non-responder | 15.8  | 1 | 0.927 | 1 |
| 398 | non-responder | 54.1  | 1 | 0.815 | 2 |
| 419 | non-responder | 9.2   | 1 | 0.933 | 1 |
| 431 | non-responder | 6.6   | 1 | 0.933 | 1 |
| 432 | responder     | -23.8 | 1 | 0.623 | 2 |
| 435 | responder     | 18.5  | 1 | 0.922 | 1 |
| 446 | non-responder | -7.4  | 1 | 0.889 | 2 |
| 447 | non-responder | 15.0  | 1 | 0.928 | 1 |

|     |               |       |   |       |   |
|-----|---------------|-------|---|-------|---|
| 329 | non-responder | -0.9  | 1 | 0.804 | 1 |
| 330 | responder     | -74.3 | 2 | 0.957 | 2 |
| 353 | non-responder | -9.3  | 1 | 0.674 | 1 |
| 398 | non-responder | 32.4  | 1 | 0.865 | 1 |
| 419 | non-responder | -13.2 | 1 | 0.573 | 1 |
| 431 | non-responder | 0.2   | 1 | 0.815 | 1 |
| 432 | responder     | -55.4 | 2 | 0.908 | 2 |
| 435 | responder     | -61.8 | 2 | 0.945 | 2 |
| 446 | non-responder | -2.5  | 1 | 0.786 | 1 |
| 447 | non-responder | -11.7 | 1 | 0.614 | 1 |

|                       |         |
|-----------------------|---------|
| AIC unimodal (k=1)    | 168.390 |
| AIC bimodal (k=2)     | 169.500 |
| AIC trimodal (k=3)    | 171.339 |
| BIC unimodal (k=1)    | 169.935 |
| BIC bimodal (k=2)     | 173.363 |
| BIC trimodal (k=3)    | 177.519 |
| Mean Silhouette (k=2) | 0.821   |

|                       |         |
|-----------------------|---------|
| AIC unimodal (k=1)    | 181.150 |
| AIC bimodal (k=2)     | 182.817 |
| AIC trimodal (k=3)    | 185.150 |
| BIC unimodal (k=1)    | 188.483 |
| BIC bimodal (k=2)     | 179.405 |
| BIC trimodal (k=3)    | 184.404 |
| Mean Silhouette (k=2) | 0.823   |

kM, k-means clustering; GM, Gaussian mixture clustering; AIC, Akaike Information Criterion; BIC, Bayesian Information Criterion

Table S4. K-means and Gaussian mixture model clustering analysis of *ex vivo* bortezomib sensitivities, including Pt 402.
